# Supplementary material for: Metabolomics changes in brain-gut axis after unpredictable chronic mild stress
Source: PubMed Central journal article supplement (PMC8891102; doi:10.1007/s00213-021-05958-w), 2022-02-08
Supplement: 213_2021_5958_MOESM2_ESM.pdf [file 213_2021_5958_MOESM2_ESM.pdf]

Supplementary figures. “Fushun Wang. \*, Qiuyue Xu, Mingchen Jiang, Simeng Gu, Xunle Zhang, Fushun Wang, Erxi Wu, Jason H Huang” **Metabolomics Changes in Brain-gut Axis in Chronic Unpredictable Mild Stress Induced Depressive Rats**  
” **Metabolomics Changes in Brain-gut Axis in Chronic Unpredictable Mild Stress Induced Depressive Rats**

In order to verify the correlation between the jejunum and hippocampus and the metabolite content in serum, the metabolite profile of serum samples was continued to be studied by GC-MS. In serum samples, 101 endogenous metabolites were identified. After the data was normalized, QC was used to test the stability of the samples (**Figure S2 A**), and the correlation between the groups was determined by principal component analysis. The normal group and the model group can be separated (**Figure S2 B**). The differential metabolites were selected based on one-way ANOVA and q test ( $p < 0.05$ ), and there was a fold change  $> 1.2$  between the normal group and CUMS model group (**Figure S3**). For research purposes, we focused on the common metabolites the in the hippocampus and the jejunum, L-Glutamic acid and L-Tyrosine have metabolic changes in peripheral serum that are slightly different from those in the hippocampus and jejunum (**Figure S4**).

Tyrosine is an essential amino acid that easily crosses the blood-brain barrier and may be detrimental to mental illness<sup>1</sup>. Many antipsychotic drugs apparently work by inhibiting tyrosine metabolism<sup>2</sup>. Glutamate has a role in mediating the production of the nervous system Rapid inhibitory effects<sup>3</sup>. L-Glutamic acid is a glutamine product Its content in the serum of the CUMS model group is reduced, positive correlation with previous the hippocampus and jejunum experimental results. The L-Tyrosine in the serum is opposite to that in the hippocampus and jejunum, which indicates that the consumption of L-Glutamic acid by the disease may be systemic, while L-Tyrosine It may be caused by local cell depletion or absorption disorders, these still require further verification.

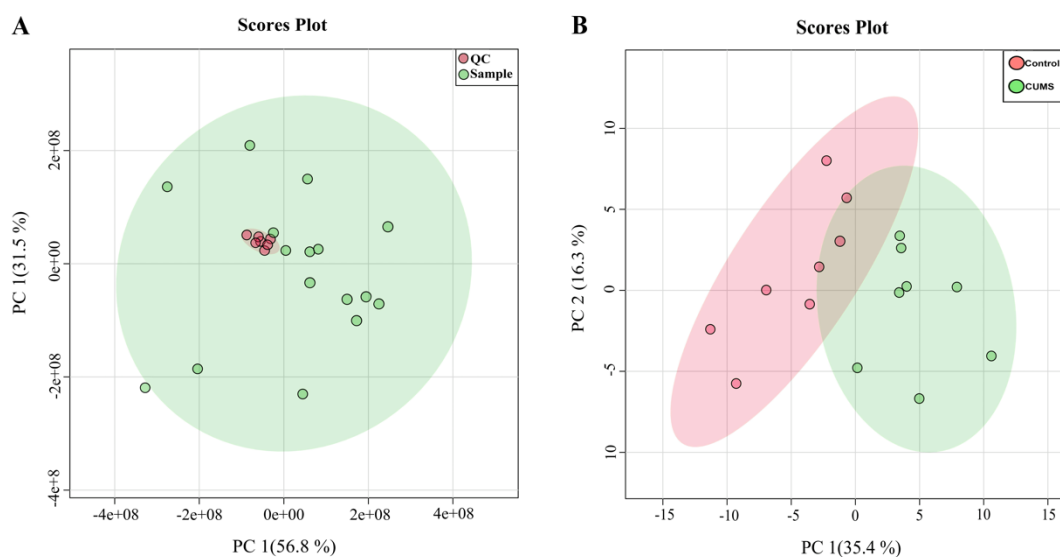

**Figure S2.** PCA score plots of metabolic profiling of QC and experimental samples in (a) serum samples. PCA scores scatter plot of (b) serum metabolites in control and CUMS.

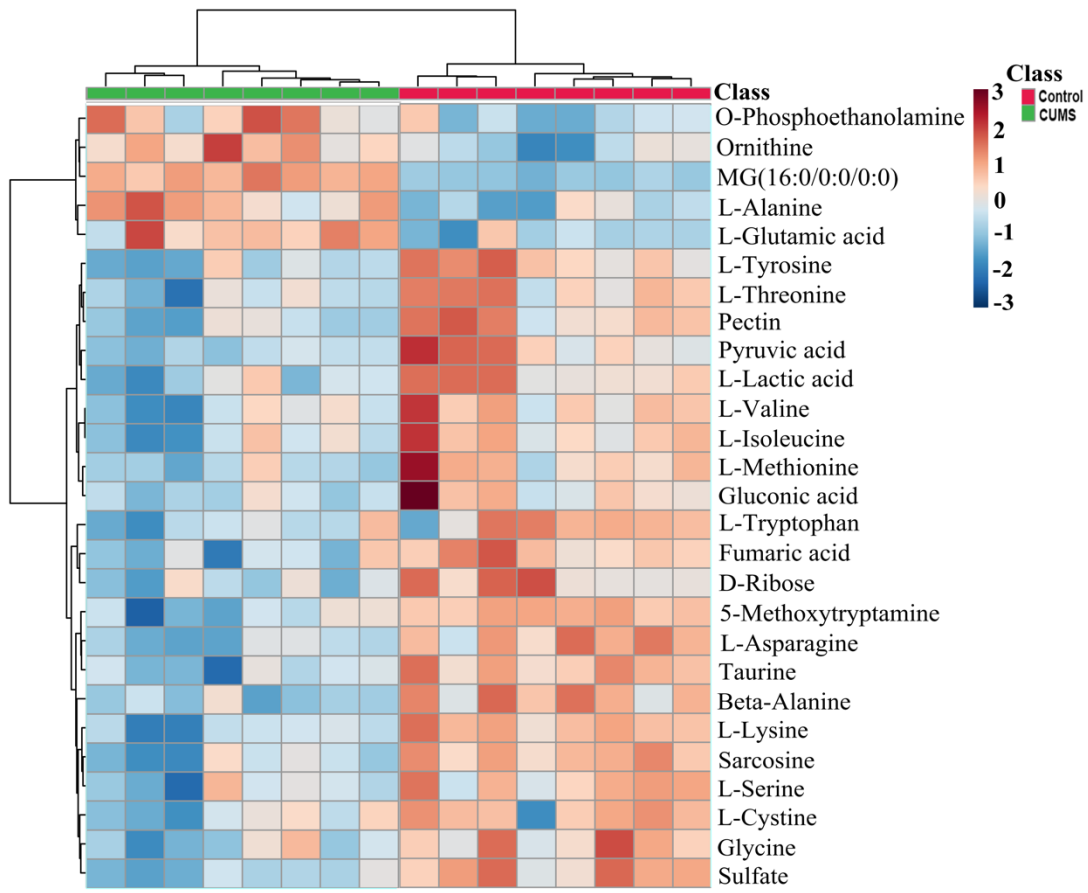

**Figure S3.** Heatmap of identified differential metabolites with serum metabolomics profile.

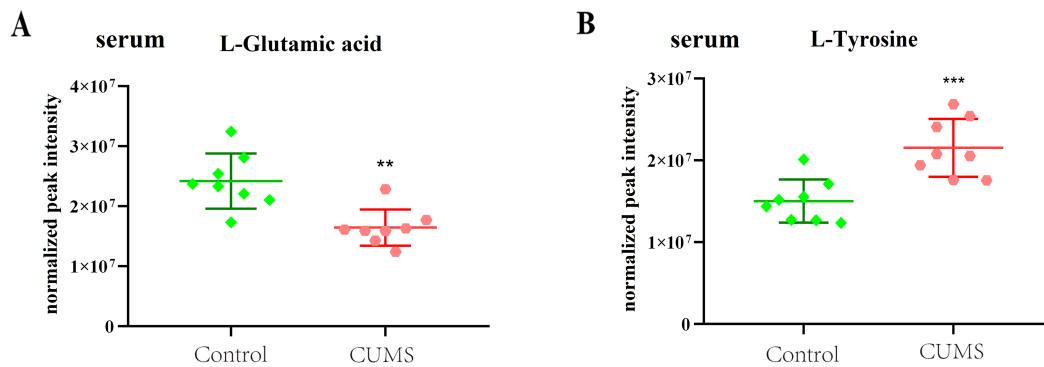

**Figure S4.** Scatter plots of significantly changed metabolites normalized peak intensity in rat serum samples. The x-axis shows the specific metabolite's normalized peak intensity, and each scatter represents a corresponding sample of the rat. \*\* $p < 0.01$ , \*\*\* $p < 0.001$ , vs. control.

## References:

1. Sogawa Rintaro, Kimura Sakiko, Yakabe Ryota et al. Anxiety and depression associated with tyrosine kinase inhibitor discontinuation in patients with chronic myeloid leukemia. [J]. Int. J. Clin. Oncol., 2018,

23: 974-979.

2. Waldmeier P C, Effects of chronic antidepressant treatment on pre- and post-synaptic dopaminergic mechanisms. A short review of the literature and some complementary experiments. [J]. *Pol J Pharmacol Pharm*, 1984, 36: 201-16.

3. Lener Marc S, Niciu Mark J, Ballard Elizabeth D et al. Glutamate and Gamma-Aminobutyric Acid Systems in the Pathophysiology of Major Depression and Antidepressant Response to Ketamine. [J]. *Biol. Psychiatry*, 2017, 81: 886-897.
